# Supplementary material
Source: PubMed Central journal article supplement (PMC8384139)
Supplement: NIHMS1732846-supplement-Supplementary_Information.pdf [file NIHMS1732846-supplement-Supplementary_Information.pdf]

# Transplanting neural progenitor cells to restore connectivity after spinal cord injury

---

*Itzhak Fischer, Jennifer N. Dulin and Michael A. Lane*

<https://doi.org/10.1038/s41583-020-0314-2>

**Supplementary Table 1. Clinical trials transplanting NPCs for repair after spinal cord injury.**

Table summarizes key clinical trials that transplanted NPCs and related cells with a goal of repair after human spinal cord injury, with references to the ClinicalTrial registry. Note that there is not presently a standard approved primary outcome measure for clinical trials in spinal cord injury, although there are several peer-reviewed guidelines<sup>224,236,240,241</sup>.

| Company/<br>Institution           | Intervention                                                                                           | Inclusion<br>Criteria                                                                   | Treatment<br>Time                            | Phase of<br>Study                                | Outcomes                                                      | Duration       | Patients<br>treated | Trial<br>Identifier<br>and Clinical<br>Ref.   |
|-----------------------------------|--------------------------------------------------------------------------------------------------------|-----------------------------------------------------------------------------------------|----------------------------------------------|--------------------------------------------------|---------------------------------------------------------------|----------------|---------------------|-----------------------------------------------|
| University of<br>Florida<br>(USA) | Developing<br>Spinal Cord<br>Tissue<br>(6-9 weeks)                                                     | >18yrs<br>Post-<br>traumatic<br>syringomyelia,<br>ASIA A-D<br>7 Thoracic, 1<br>Cervical | Chronic:<br>~11-30yrs                        | Pilot Safety<br>Study                            | Safety,<br>Graft survival,<br>Motor and<br>Sensory<br>Testing | 1997 -<br>2000 | 8                   | <sup>1,2</sup>                                |
| Yonsei<br>University<br>(Korea)   | Human neural<br>stem/progenitor<br>cells –<br>telencephalon<br>derived (13wk<br>gestation)<br>“hNSPCs” | 16-60yrs<br>AIS A-B<br>Cervical                                                         | Acute to<br>Chronic:<br><1wk to<br>>6 months | Phase I/IIa<br>Non-<br>randomized,<br>Open label | Graft survival,<br>ISNCSCI<br>exam, SSEP,<br>MEP              | 2005 -<br>2008 | 19                  | <a href="#">NCT0000879</a><br><sup>3</sup>    |
| Geron<br>(USA)                    | Oligodendrocyte<br>Precursors<br>“GRNOPC1”                                                             | 18-65yrs<br>ASIA A-B<br>Thoracic<br>(T3-T11)                                            | Acute:<br>7-14 days                          | Phase I<br>Non-<br>randomized,<br>Open label     | Safety                                                        | 2010 -<br>2011 | 5                   | <a href="#">NCT01217008</a><br><sup>4-7</sup> |
| StemCells<br>Inc                  | Human brain<br>derived neural                                                                          | 18-60yrs<br>ASIA A-C                                                                    | >12 weeks                                    | Phase I/II<br>Single blind                       | Safety,<br>Graft survival,                                    | 2011 -<br>2015 | 12                  | <a href="#">NCT01321333</a><br>Follow-up      |

|                                                                                          |                                                                                           |                                                                    |                                 |                                   |                                                                                             |                  |                |                                                                               |
|------------------------------------------------------------------------------------------|-------------------------------------------------------------------------------------------|--------------------------------------------------------------------|---------------------------------|-----------------------------------|---------------------------------------------------------------------------------------------|------------------|----------------|-------------------------------------------------------------------------------|
| "Pathway"<br>(USA)                                                                       | stem cells<br>"HuCNS-SC"                                                                  | Thoracic<br>(T2-T12)                                               |                                 | Randomized                        | ISNCSCI<br>exam                                                                             |                  |                | studies:<br><a href="#">NCT01725880</a><br><a href="#">NCT03069404</a><br>8,9 |
|                                                                                          |                                                                                           | 18-60yrs<br>ASIA B-C<br>Cervical                                   |                                 | Phase II<br>Single,<br>Randomized | Safety,<br>Graft survival,<br>ISNCSCI<br>exam                                               | 2014 -<br>2016   | 31             | <a href="#">NCT02163876</a>                                                   |
| NeuralStem<br>[now Seneca<br>Biopharma]<br>(USA)                                         | Human fetal<br>spinal cord<br>derived neural<br>stem cells:<br>NSI-566RSC<br>"NeuroCells" | 18-65yrs<br>AIS A<br>Thoracic<br>(T2-T12)<br>& Cervical<br>(C5-C7) | Chronic:<br>1-2 years           | Phase I<br>Open label             | Safety,<br>Graft Survival,<br>ISNCSCI<br>exam,<br>Bowel<br>function,<br>Bladder<br>function | 2014 -<br>Active | Estimated<br>8 | <a href="#">NCT01772810</a>                                                   |
| Asterias<br>[then<br>BioTime, now<br>Lineage Cell<br>Therapeutics]<br>"SCiStar"<br>(USA) | Oligodendrocyte<br>Precursors<br>"AST-OPC1"<br>(continued from<br>Geron)                  | 18-69yrs<br>ASIA A-B<br>Cervical<br>(C5-C7)                        | Sub-<br>acute:<br>14-42<br>days | Phase I/IIa<br>Open label         | Safety, Graft<br>survival,<br>ISNCSCI<br>exam                                               | 2015 -<br>2017   | 25             | <a href="#">NCT02302157</a>                                                   |
| NeuroRegen<br>Scaffold<br>(China)                                                        | Scaffold™<br>Combined With<br>Mesenchymal<br>Stem Cells or<br>Neural Stem<br>Cells        | 18-65yrs<br>ASIA A<br>cervical and<br>thoracic (C5-<br>T12).       | Chronic                         | Phase I/II                        | Improvements<br>in ASIA,<br>SSEP, MEP                                                       | 2016-<br>2020    | 30             | <a href="#">NCT02688049</a>                                                   |

|                                 |                                             |                                            |                          |         |        |           |    |                             |
|---------------------------------|---------------------------------------------|--------------------------------------------|--------------------------|---------|--------|-----------|----|-----------------------------|
| Novagenesis Foundation (Russia) | Autologous Neural Stem Cells with 3D matrix | 18-50yrs ASIA A Cervical, thoracic, lumbar | Acute, subacute, chronic | Phase I | Safety | 2014-2018 | 30 | <a href="#">NCT02326662</a> |
|---------------------------------|---------------------------------------------|--------------------------------------------|--------------------------|---------|--------|-----------|----|-----------------------------|

#### References:

- 1 Thompson, F. J. *et al.* Neurophysiological assessment of the feasibility and safety of neural tissue transplantation in patients with syringomyelia. *J Neurotrauma* **18**, 931-945, doi:10.1089/089771501750451848 (2001).
- 2 Wirth, E. D., 3rd *et al.* Feasibility and safety of neural tissue transplantation in patients with syringomyelia. *J Neurotrauma* **18**, 911-929, doi:10.1089/089771501750451839 (2001).
- 3 Shin, J. C. *et al.* Clinical Trial of Human Fetal Brain-Derived Neural Stem/Progenitor Cell Transplantation in Patients with Traumatic Cervical Spinal Cord Injury. *Neural Plast* **2015**, 630932, doi:10.1155/2015/630932 (2015).
- 4 Chapman, A. R. & Scala, C. C. Evaluating the first-in-human clinical trial of a human embryonic stem cell-based therapy. *Kennedy Inst Ethics J* **22**, 243-261, doi:10.1353/ken.2012.0013 (2012).
- 5 Bretzner, F., Gilbert, F., Baylis, F. & Brownstone, R. M. Target populations for first-in-human embryonic stem cell research in spinal cord injury. *Cell Stem Cell* **8**, 468-475, doi:10.1016/j.stem.2011.04.012 (2011).
- 6 Wirth, E., 3rd, Lebkowski, J. S. & Lebacqz, K. Response to Frederic Bretzner et al. "Target populations for first-in-human embryonic stem cell research in spinal cord injury". *Cell Stem Cell* **8**, 476-478, doi:10.1016/j.stem.2011.04.008 (2011).
- 7 Strauss, S. Geron trial resumes, but standards for stem cell trials remain elusive. *Nat Biotechnol* **28**, 989-990, doi:10.1038/nbt1010-989 (2010).
- 8 Levi, A. D. *et al.* Emerging Safety of Intramedullary Transplantation of Human Neural Stem Cells in Chronic Cervical and Thoracic Spinal Cord Injury. *Neurosurgery* **82**, 562-575, doi:10.1093/neuros/nyx250 (2018).
- 9 Anderson, A. J., Piltti, K. M., Hooshmand, M. J., Nishi, R. A. & Cummings, B. J. Preclinical Efficacy Failure of Human CNS-Derived Stem Cells for Use in the Pathway Study of Cervical Spinal Cord Injury. *Stem Cell Reports* **8**, 249-263, doi:10.1016/j.stemcr.2016.12.018 (2017).
